# Supplementary material for: Niche divergence promotes rapid diversification of East African sky island white-eyes (Aves: Zosteropidae)
Source: PubMed Central journal article supplement (PMC4255762; doi:10.1111/mec.12840), 2014-07-08
Supplement: mec0023-4103-SD2.pdf [file mec0023-4103-SD2.pdf]

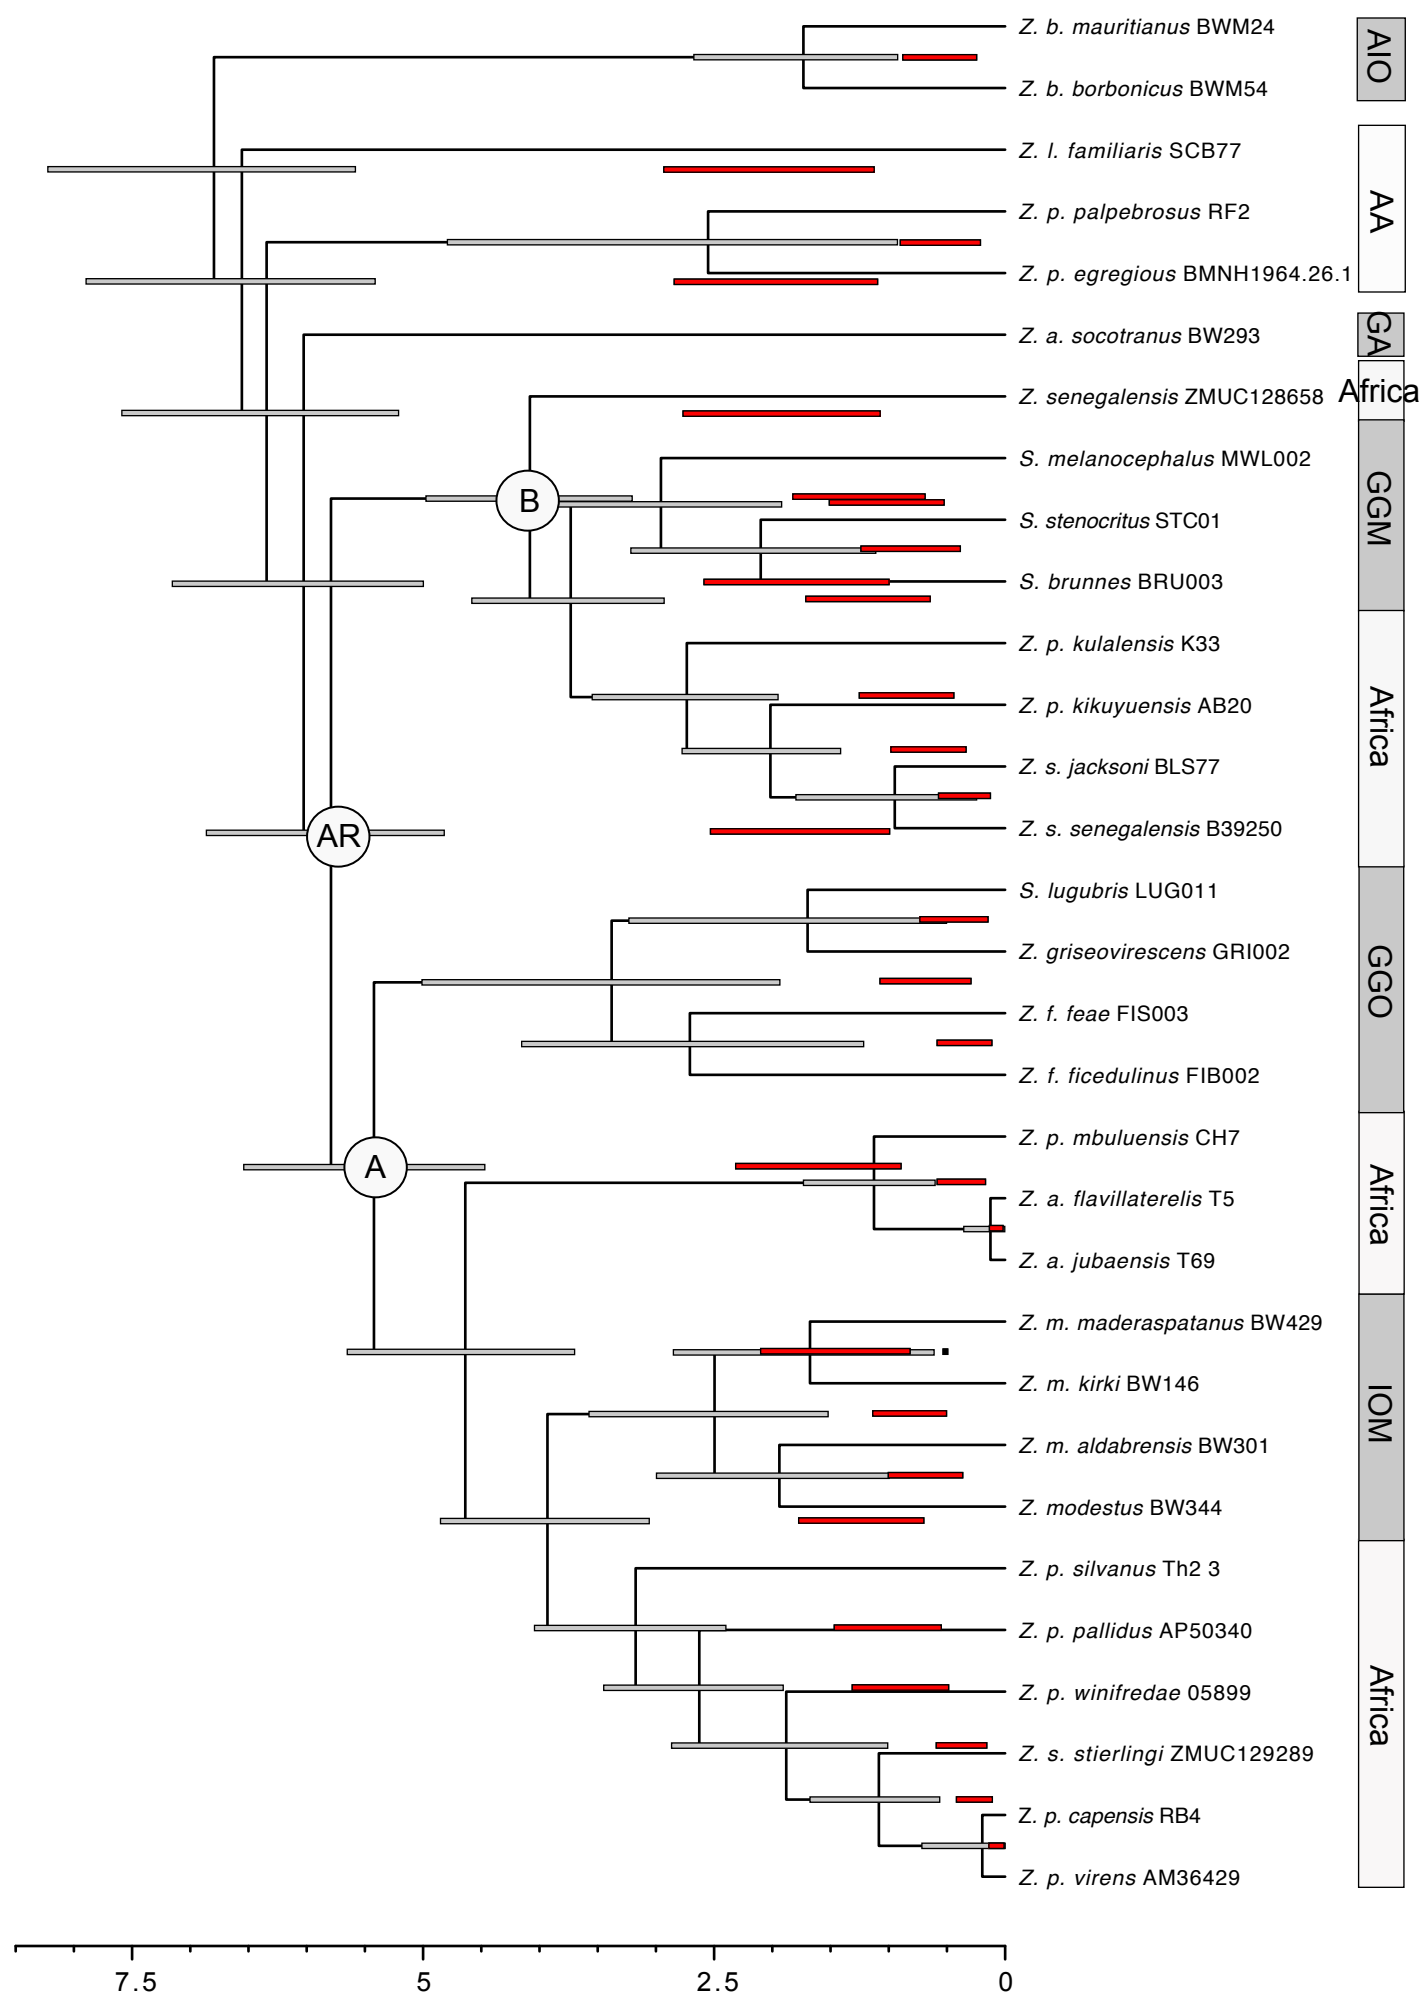

**Fig. S1** Divergence estimates for *Zosterops* generated using BEAST based on the 2.1% avian molecular clock for the Cyt *b* dataset. 95% Highest Posterior Density (HPD) bars in grey, while those in red are superimposed from Fig. 3 (i.e. based on the volcanic island calibrated timetree).
