# Supplementary material for: Niche divergence promotes rapid diversification of East African sky island white-eyes (Aves: Zosteropidae)
Source: PubMed Central journal article supplement (PMC4255762; doi:10.1111/mec.12840), 2014-07-08
Supplement: mec0023-4103-SD3.pdf [file mec0023-4103-SD3.pdf]

**Table S1** Taxa, sampling locations, altitude and Genbank accession numbers used in this study.

| Taxon                         | Locality                         | Altitude (m) | Sample code    | Source | Photo | AFLP | ND3      | Cyt b     |
|-------------------------------|----------------------------------|--------------|----------------|--------|-------|------|----------|-----------|
| <i>Zosterornis whiteheadi</i> | Philippines                      |              | KUNHM 18001    | NCBI   |       |      | JN826960 | JN8272210 |
| <b>Zosterops</b>              |                                  |              |                |        |       |      |          |           |
| <b><i>Z. palpebrosus</i></b>  |                                  |              |                |        |       |      |          |           |
| <i>palpebrosus</i>            | Nepal                            |              | RF2            | NCBI   |       |      | DQ328448 | DQ328348  |
| <i>egregious</i>              | Sasan, Kathiawar, Gujarat, India |              | BMNH 1964.26.1 | NCBI   |       |      | DQ328450 | DQ328350  |
| <b><i>Z. lateralis</i></b>    | Brisbane, Australia              |              | SCB77          | NCBI   |       |      | DQ328488 | DQ328388  |
| <b><i>Z. abyssinicus</i></b>  |                                  |              |                |        |       |      |          |           |
| <i>socotranus</i>             | Socotra, Gulf of Aden            |              | BW292          | WARREN |       | ✓    | LK056917 | LK056803  |
| <i>socotranus</i>             | Socotra, Gulf of Aden            |              | BW293          | WARREN |       | ✓    | LK056918 | LK056804  |
| <i>jubaensis</i>              | South Horr, Kenya                | 1065         | T60            | COX    | ✓     | ✓    | LK056844 | LK056734  |
| <i>jubaensis</i>              | South Horr, Kenya                | 1065         | T61            | COX    | ✓     | ✓    | LK056847 | LK056737  |
| <i>jubaensis</i>              | South Horr, Kenya                | 1065         | T65            | COX    | ✓     | ✓    | LK056848 | LK056738  |
| <i>jubaensis</i>              | South Horr, Kenya                | 1065         | T69            | COX    | ✓     | ✓    | LK056845 | LK056735  |
| <i>jubaensis</i>              | South Horr, Kenya                | 1065         | T70            | COX    | ✓     | ✓    | LK056849 | LK056739  |
| <i>jubaensis</i>              | South Horr, Kenya                | 1065         | T73            | COX    | ✓     | ✓    | LK056846 | LK056736  |
| <i>jubaensis</i>              | South Horr, Kenya                | 1065         | T76            | COX    | ✓     |      | LK056840 |           |
| <i>jubaensis</i>              | South Horr, Kenya                | 1065         | T77            | COX    | ✓     | ✓    | LK056841 | LK056733  |
| <i>jubaensis</i>              | South Horr, Kenya                | 1065         | T84            | COX    | ✓     |      | LK056843 |           |
| <i>jubaensis</i>              | South Horr, Kenya                | 1065         | T85            | COX    | ✓     |      | LK056842 |           |
| <i>flavilateralis</i>         | Umani spring, Kenya              | 927          | T4             | COX    | ✓     |      | LK056831 | LK056724  |
| <i>flavilateralis</i>         | Umani spring, Kenya              | 927          | T5             | COX    | ✓     | ✓    | LK056830 | LK056723  |
| <i>flavilateralis</i>         | Umani spring, Kenya              | 927          | T11            | COX    | ✓     | ✓    | LK056832 | LK056725  |
| <i>flavilateralis</i>         | Umani spring, Kenya              | 927          | T14            | COX    | ✓     |      | LK056836 | LK056729  |
| <i>flavilateralis</i>         | Umani spring, Kenya              | 927          | T15            | COX    | ✓     | ✓    | LK056837 | LK056730  |
| <i>flavilateralis</i>         | Umani spring, Kenya              | 927          | T17            | COX    | ✓     | ✓    | LK056833 | LK056726  |

|                        |                         |      |             |           |   |   |          |          |  |
|------------------------|-------------------------|------|-------------|-----------|---|---|----------|----------|--|
| <i>flavilateralis</i>  | Umani spring, Kenya     | 927  | T20         | COX       | ✓ | ✓ | LK056834 | LK056727 |  |
| <i>flavilateralis</i>  | Umani spring, Kenya     | 927  | T21         | COX       | ✓ | ✓ | LK056838 | LK056731 |  |
| <i>flavilateralis</i>  | Umani spring, Kenya     | 927  | T23         | COX       | ✓ |   | LK056835 | LK056728 |  |
| <i>flavilateralis</i>  | Umani spring, Kenya     | 927  | T30         | COX       | ✓ | ✓ | LK056839 | LK056732 |  |
| <i>flavilateralis</i>  | Nairobi, Kenya          |      | RB3         | NCBI      |   |   | DQ328439 | DQ328339 |  |
| <b>Z. pallidus</b>     |                         |      |             |           |   |   |          |          |  |
| <i>pallidus</i>        | South Africa            |      | AP50340     | PFIAO     |   | ✓ | LK056910 | LK056796 |  |
| <i>capensis</i>        | Cape Town, South Africa |      | RB4         | PFIAO     |   |   | LK056905 | LK056791 |  |
| <i>capensis</i>        | Cape Town, South Africa |      | RB1         | PFIAO     |   |   | LK056906 | LK056792 |  |
| <i>capensis</i>        | Cape Town, South Africa |      | RB4         | PFIAO     |   |   | LK056905 | LK056791 |  |
| <i>capensis</i>        | Cape Town, South Africa |      | K1          | PFIAO     |   | ✓ |          |          |  |
| <i>virens</i>          | South Africa            |      | AM36429     | PFIAO     |   | ✓ | LK056907 | LK056793 |  |
| <i>virens</i>          | South Africa            |      | AM36433     | PFIAO     |   | ✓ | LK056908 | LK056794 |  |
| <b>Z. senegalensis</b> |                         |      |             |           |   |   |          |          |  |
| <i>senegalensis</i>    | Northern Region, Ghana  |      | B39250      | NCBI      |   |   | DQ328443 | DQ328343 |  |
| <i>senegalensis</i>    | Northern Region, Ghana  |      | B39514      | NCBI      |   |   | DQ328442 | DQ328342 |  |
| <i>senegalensis</i>    | Rwenzori, Uganda        |      | ZMUC145103  | ZMUC      |   | ✓ |          |          |  |
| <i>senegalensis</i>    | Rwenzori, Uganda        |      | ZMUC145211  | ZMUC      |   | ✓ |          |          |  |
| <i>stenocricotus</i>   | Mt Cameroon, Cameroon   |      | STC01       | MELO      |   | ✓ | LK056895 | LK056782 |  |
| <i>stenocricotus</i>   | Mt Cameroon, Cameroon   |      | STC03       | MELO      |   | ✓ | LK056896 |          |  |
| <i>jacksoni</i>        | Mathews Range, Kenya    | 1600 | BLS06       | BORGHESIO |   | ✓ | LK056873 | LK056762 |  |
| <i>jacksoni</i>        | Mt Nyiru, Kenya         | 2600 | BLS35       | BORGHESIO |   |   | LK056883 | LK056772 |  |
| <i>jacksoni</i>        | Mt Nyiru, Kenya         | 2600 | BLS36       | BORGHESIO |   | ✓ |          |          |  |
| <i>jacksoni</i>        | Mt Nyiru, Kenya         | 2600 | BLS65       | BORGHESIO |   | ✓ | LK056882 | LK056771 |  |
| <i>jacksoni</i>        | Mathews Range, Kenya    | 1600 | BLS77       | BORGHESIO |   | ✓ | LK056871 | LK056760 |  |
| <i>jacksoni</i>        | Mathews Range, Kenya    | 1600 | BLS81       | BORGHESIO |   | ✓ | LK056872 | LK056761 |  |
| <i>jacksoni</i>        | Mt Nyiru, Kenya         |      | ZMUC 131316 | ZMUC      |   | ✓ | LK056889 |          |  |

|                   |                                           |      |             |      |   |   |          |          |
|-------------------|-------------------------------------------|------|-------------|------|---|---|----------|----------|
| <i>jacksoni</i>   | Mt Nyiru, Kenya                           |      | ZMUC 131317 | ZMUC |   | ✓ | LK056886 | LK056774 |
| <i>jacksoni</i>   | Mt Nyiru, Kenya                           |      | ZMUC 131324 | ZMUC |   |   | LK056885 | LK056773 |
| <i>jacksoni</i>   | Mt Nyiru, Kenya                           |      | ZMUC 131325 | ZMUC |   |   | LK056884 |          |
| <i>jacksoni</i>   | Mt Nyiru, Kenya                           |      | ZMUC 131331 | ZMUC |   | ✓ | LK056887 | LK056779 |
| <i>jacksoni</i>   | N. Aberdares, Kenya                       |      | ZMUC 146780 | ZMUC |   |   | LK056888 | LK056775 |
| <i>jacksoni</i>   | N. Aberdares, Kenya                       |      | ZMUC 146784 | ZMUC |   |   | LK056890 | LK056777 |
| <i>jacksoni</i>   | N. Aberdares, Kenya                       |      | ZMUC 146785 | ZMUC |   | ✓ | LK056891 | LK056778 |
| <i>jacksoni</i>   | N. Aberdares, Kenya                       |      | ZMUC 146786 | ZMUC |   | ✓ |          | LK056776 |
| <i>jacksoni</i>   | N. Aberdares, Kenya                       |      | ZMUC 146787 | ZMUC |   | ✓ |          |          |
| <i>jacksoni</i>   | Kakamega, Kenya                           | 1627 | T41         | COX  | ✓ | ✓ | LK056874 | LK056763 |
| <i>jacksoni</i>   | Kakamega, Kenya                           | 1627 | T42         | COX  | ✓ | ✓ | LK056878 | LK056767 |
| <i>jacksoni</i>   | Kakamega, Kenya                           | 1627 | T49         | COX  | ✓ | ✓ | LK056875 | LK056764 |
| <i>jacksoni</i>   | Kakamega, Kenya                           | 1627 | T50         | COX  | ✓ |   | LK056877 | LK056766 |
| <i>jacksoni</i>   | Kakamega, Kenya                           | 1627 | T51         | COX  | ✓ |   | LK056881 | LK056770 |
| <i>jacksoni</i>   | Kakamega, Kenya                           | 1627 | T52         | COX  | ✓ |   | LK056879 | LK056768 |
| <i>jacksoni</i>   | Kakamega, Kenya                           | 1627 | T53         | COX  | ✓ | ✓ | LK056880 | LK056769 |
| <i>jacksoni</i>   | Kakamega, Kenya                           | 1627 | T54         | COX  |   |   | LK056876 | LK056765 |
| <i>stierlingi</i> | Tabora, Tanzania                          |      | ZMUC 145467 | ZMUC |   | ✓ | LK056897 | LK056783 |
| <i>stierlingi</i> | Udzungwa Mts, Tanzania                    |      | ZMUC 140192 | ZMUC |   | ✓ | LK056901 | LK056787 |
| <i>stierlingi</i> | Poroto Mts, Tanzania                      |      | ZMUC 142605 | ZMUC |   |   | LK056902 | LK056788 |
| <i>stierlingi</i> | Poroto Mts, Tanzania                      |      | ZMUC 142607 | ZMUC |   | ✓ | LK056898 | LK056784 |
| <i>stierlingi</i> | W. Usambara Mts, Tanzania                 |      | ZMUC 129298 | ZMUC |   | ✓ | LK056900 | LK056786 |
| <i>stierlingi</i> | W. Usambara Mts, Tanzania                 |      | ZMUC 129289 | ZMUC |   |   | LK056899 | LK056785 |
| <i>stierlingi</i> | Simba Forest, West Kilimanjaro, Tanzania  |      | ZMUC 121003 | ZMUC |   | ✓ |          |          |
| <i>stierlingi</i> | Simba Forest, West Kilimanjaro , Tanzania |      | ZMUC 121004 | ZMUC |   | ✓ |          |          |
| <i>stierlingi</i> | Uhafiwa, Tanzania                         |      | O8255       | NCBI |   |   | DQ328438 | DQ328338 |
| sp.               | Kivu, Democratic Republic of the Congo    |      | ZMUC 128660 | ZMUC |   |   | LK056893 | LK056780 |
| sp.               | Kivu, Democratic Republic of the          |      | ZMUC 128632 | ZMUC |   |   | LK056892 | LK056779 |

| sp.                    | Congo<br>Kivu, Democratic Republic of the<br>Congo |      | ZMUC 128658 | ZMUC  |   |   | LK056894 | LK056781 |
|------------------------|----------------------------------------------------|------|-------------|-------|---|---|----------|----------|
| <b>Z. poliogastrus</b> |                                                    |      |             |       |   |   |          |          |
| <i>kulalensis</i>      | Mt Kulal, Kenya                                    | 1932 | K30         | COX   | ✓ | ✓ | LK056819 | LK056711 |
| <i>kulalensis</i>      | Mt Kulal, Kenya                                    | 1932 | K31         | COX   | ✓ |   | LK056822 | LK056714 |
| <i>kulalensis</i>      | Mt Kulal, Kenya                                    | 1932 | K33         | COX   | ✓ | ✓ | LK056816 | LK056708 |
| <i>kulalensis</i>      | Mt Kulal, Kenya                                    | 1932 | K34         | COX   | ✓ | ✓ | LK056821 | LK056713 |
| <i>kulalensis</i>      | Mt Kulal, Kenya                                    | 1932 | K35         | COX   | ✓ | ✓ | LK056817 | LK056709 |
| <i>kulalensis</i>      | Mt Kulal, Kenya                                    | 1932 | K37         | COX   | ✓ | ✓ | LK056818 | LK056710 |
| <i>kulalensis</i>      | Mt Kulal, Kenya                                    | 1932 | K38         | COX   | ✓ | ✓ | LK056823 | LK056715 |
| <i>kulalensis</i>      | Mt Kulal, Kenya                                    | 1932 | K39         | COX   | ✓ | ✓ | LK056824 | LK056716 |
| <i>kulalensis</i>      | Mt Kulal, Kenya                                    | 1932 | K41         | COX   | ✓ |   | LK056820 | LK056712 |
| <i>kulalensis</i>      | Mt Kulal, Kenya                                    | 1932 | K42         | COX   | ✓ | ✓ | LK056825 | LK056717 |
| <i>kulalensis</i>      | Mt Kulal, Kenya                                    | 1800 | 2MK3        | HABEL |   | ✓ | LK056826 | LK056718 |
| <i>kulalensis</i>      | Mt Kulal, Kenya                                    | 1800 | 2MK7        | HABEL |   |   | LK056827 | LK056719 |
| <i>kulalensis</i>      | Mt Kulal, Kenya                                    | 1800 | 2MK8        | HABEL |   |   | LK056828 | LK056720 |
| <i>kulalensis</i>      | Mt Kulal, Kenya                                    | 1800 | 2MK9        | HABEL |   |   | LK056829 | LK056721 |
| <i>kulalensis</i>      | Mt Kulal, Kenya                                    | 1800 | 2MK10       | HABEL |   |   |          | LK056722 |
| <i>kikuyuensis</i>     | Mt Kenya, Kenya                                    | 2900 | MK1         | HABEL |   |   | LK056859 | LK056750 |
| <i>kikuyuensis</i>     | Mt Kenya, Kenya                                    | 2900 | MK2         | HABEL |   |   | LK056862 | LK056752 |
| <i>kikuyuensis</i>     | Mt Kenya, Kenya                                    | 2900 | MK3         | HABEL |   | ✓ | LK056861 | LK056751 |
| <i>kikuyuensis</i>     | Mt Kenya, Kenya                                    | 2900 | MK6         | HABEL |   | ✓ | LK056863 | LK056753 |
| <i>kikuyuensis</i>     | Mt Kenya, Kenya                                    | 2900 | MK7         | HABEL |   |   | LK056860 |          |
| <i>kikuyuensis</i>     | Aberdares Range, Kenya                             | 2700 | AB2         | HABEL |   | ✓ | LK056865 |          |
| <i>kikuyuensis</i>     | Aberdares Range, Kenya                             | 2700 | AB4         | HABEL |   | ✓ | LK056868 | LK056757 |
| <i>kikuyuensis</i>     | Aberdares Range, Kenya                             | 2700 | AB10        | HABEL |   | ✓ | LK056867 | LK056756 |
| <i>kikuyuensis</i>     | Aberdares Range, Kenya                             | 2700 | AB11        | HABEL |   |   | LK056869 | LK056758 |
| <i>kikuyuensis</i>     | Aberdares Range, Kenya                             | 2700 | AB12        | HABEL |   | ✓ | LK056870 | LK056759 |

|                    |                             |      |         |       |   |          |          |
|--------------------|-----------------------------|------|---------|-------|---|----------|----------|
| <i>kikuyuensis</i> | Aberdares Range, Kenya      | 2700 | AB13    | HABEL |   | LK056864 | LK056754 |
| <i>kikuyuensis</i> | Aberdares Range, Kenya      | 2700 | AB20    | HABEL | ✓ | LK056866 | LK056755 |
| <i>kikuyuensis</i> | Mt Kenya, Kenya             |      | RB2     | NCBI  |   | DQ328447 | DQ328247 |
| <i>silvanus</i>    | Mbololo, Taita Hills, Kenya |      | 08580   | NCBI  |   | DQ328437 | DQ328337 |
| <i>silvanus</i>    | Taita Hills, Kenya          | 1900 | TH 1-2  | HABEL |   | LK056813 | LK056704 |
| <i>silvanus</i>    | Taita Hills, Kenya          | 1900 | TH 1-3  | HABEL | ✓ | LK056812 | LK056703 |
| <i>silvanus</i>    | Taita Hills, Kenya          | 1900 | TH 1-10 | HABEL | ✓ | LK056811 | LK056702 |
| <i>silvanus</i>    | Taita Hills, Kenya          | 1900 | TH 1-13 | HABEL | ✓ |          |          |
| <i>silvanus</i>    | Taita Hills, Kenya          | 1900 | TH 1-21 | HABEL | ✓ |          | LK056707 |
| <i>silvanus</i>    | Taita Hills, Kenya          | 1900 | TH 2-3  | HABEL | ✓ | LK056805 | LK056696 |
| <i>silvanus</i>    | Taita Hills, Kenya          | 1900 | TH 2-10 | HABEL | ✓ | LK056806 | LK056697 |
| <i>silvanus</i>    | Taita Hills, Kenya          | 1900 | TH 2-12 | HABEL | ✓ | LK056809 | LK056700 |
| <i>silvanus</i>    | Taita Hills, Kenya          | 1900 | TH 2-15 | HABEL | ✓ | LK056808 | LK056699 |
| <i>silvanus</i>    | Taita Hills, Kenya          | 1900 | TH 3-12 | HABEL | ✓ | LK056810 | LK056701 |
| <i>silvanus</i>    | Taita Hills, Kenya          | 1900 | TH 3-13 | HABEL |   | LK056814 | LK056705 |
| <i>silvanus</i>    | Taita Hills, Kenya          | 1900 | TH 3-20 | HABEL | ✓ | LK056807 | LK056698 |
| <i>silvanus</i>    | Taita Hills, Kenya          | 1900 | TH 3-21 | HABEL | ✓ | LK056815 | LK056706 |
| <i>mbuluensis</i>  | Chyulu Hills, Kenya         | 1900 | CH1     | HABEL | ✓ | LK056852 | LK056742 |
| <i>mbuluensis</i>  | Chyulu Hills, Kenya         | 1900 | CH3     | HABEL |   | LK056854 | LK056744 |
| <i>mbuluensis</i>  | Chyulu Hills, Kenya         | 1900 | CH6     | HABEL | ✓ | LK056853 | LK056743 |
| <i>mbuluensis</i>  | Chyulu Hills, Kenya         | 1900 | CH7     | HABEL | ✓ | LK056850 | LK056740 |
| <i>mbuluensis</i>  | Chyulu Hills, Kenya         | 1900 | CH8     | HABEL | ✓ | LK056851 | LK056741 |
| <i>mbuluensis</i>  | Chyulu Hills, Kenya         | 1900 | 2CH9    | HABEL | ✓ | LK056855 | LK056745 |
| <i>mbuluensis</i>  | Chyulu Hills, Kenya         | 1900 | 2CH11   | HABEL | ✓ | LK056856 | LK056746 |
| <i>mbuluensis</i>  | Chyulu Hills, Kenya         | 1900 | 2CH10   | HABEL | ✓ |          | LK056747 |
| <i>mbuluensis</i>  | Chyulu Hills, Kenya         | 1900 | 2CH12   | HABEL | ✓ | LK056857 | LK056748 |
| <i>mbuluensis</i>  | Chyulu Hills, Kenya         | 1900 | 2CH13   | HABEL | ✓ | LK056858 | LK056749 |

|                           |                                    |        |        |   |          |          |
|---------------------------|------------------------------------|--------|--------|---|----------|----------|
| <i>winifredae</i>         | South Pare Mts, Tanzania           | O5899  | NCBI   |   | DQ328436 | DQ328336 |
| <b>Z. borbonicus</b>      |                                    |        |        |   |          |          |
| <i>borbonicus</i>         | La Réunion, Mascarenes             | BWM46  | NCBI   | ✓ | DQ328497 | DQ328397 |
| <i>borbonicus</i>         | La Réunion, Mascarenes             | BWM47  | NCBI   |   | DQ328496 | DQ328396 |
| <i>borbonicus</i>         | La Réunion, Mascarenes             | BWM54  | WARREN | ✓ | LK056916 | LK056802 |
| <i>mauritanus</i>         | Mauritus, Mascarenes               | BWM17  | WARREN | ✓ | LK056914 | LK056800 |
| <i>mauritanus</i>         | Mauritus, Mascarenes               | BWM25  | WARREN | ✓ | LK056915 | LK056801 |
| <i>mauritanus</i>         | Mauritus, Mascarenes               | BWM24  | WARREN |   | LK056913 | LK056799 |
| <b>Z. ficedulinus</b>     |                                    |        |        |   |          |          |
| <i>ficedulinus</i>        | Annobón, Gulf of Guinea            | FIP002 | NCBI   |   | GU827278 | GU827230 |
| <i>feae</i>               | São Tomé, Gulf of Guinea           | FIS003 | NCBI   |   | GU827280 | GU827232 |
| <b>Z. griseovirescens</b> | Príncipe Island, Gulf of Guinea    | GRI002 | NCBI   |   | GU827282 | GU827234 |
| <b>Z. maderaspatanus</b>  |                                    |        |        |   |          |          |
| <i>aldabrensis</i>        | Aldabra, Aldabra Group, Seychelles | BW301  | NCBI   |   | DQ328487 | DQ328387 |
| <i>maderaspatanus</i>     | Mt Ankaratra, Madagascar           | BW429  | WARREN |   | LK056911 | LK056797 |
| <i>maderaspatanus</i>     | Mt Ankaratra, Madagascar           | BW445  | WARREN |   | LK056912 | LK056798 |
| <i>kirki</i>              | Grande Comore, Comoros             | BW146  | NCBI   |   | DQ328476 | DQ328376 |
| <b>Z. modestus</b>        | Conception, Seychelles             | BW344  | NCBI   |   | DQ328463 | DQ328363 |
| <b>Speirops</b>           |                                    |        |        |   |          |          |
| <b>S. brunneus</b>        | Bioko, Gulf of Guinea              | BRU003 | NCBI   |   | GU827268 | GU827220 |
| <b>S. melanocephalus</b>  | Mt Cameroon, Cameroon              | MEL002 | NCBI   |   | GU827266 | GU827218 |
| <b>S. lugubris</b>        | São Tomé, Gulf of Guinea           | LUG001 | MELO   |   | LK056904 | LK056790 |
| <b>S. lugubris</b>        | São Tomé, Gulf of Guinea           | LUG011 | MELO   | ✓ | LK056903 | LK056789 |

#### Institutional abbreviations

BMNH, Natural History Museum, London; KUNHM, University of Kansas Natural History; PFIAO, Percy FitzPatrick Institute of African Ornithology, South Africa; ZMUC, Zoological Museum, University of Copenhagen.

## Sampling

Within East Africa, 51 *Z. poliogastrus* samples were collected from five isolated montane forests, giving an excellent coverage of the restricted distributions of the four subspecies: *Z. p. silvanus* (Taita Hills and Mt Kasigau), *Z. p. mbuluensis* (Chyulu Hills and Ol Doinyo Orok), *Z. p. kulalensis* (Mt Kulalensis) and *Z. p. kikuyensis* (Central Kenyan Highlands) (Fig. 1C). Additional sequences for *Z. p. winifredae* (1 individual) were obtained from Genbank, enabling the phylogenetic assessment of five of the eight recognised *Z. poliogaster* subspecies (Dickinson 2003). Unfortunately it was not possible to obtain samples for three *Z. poliogastrus* subspecies represented by the two Ethiopian subspecies (*Z. p. poliogaster* and *Z. p. kaffensis*) and one Tanzanian subspecies (*Z. p. eurycricotus*). A further 29 samples of *Z. senegalensis* from higher elevations populations were sampled, including four populations of *Z. s. jacksoni* (Kenya) and three populations of *Z. s. stierlingi* (Tanzania). Within Kenya an additional 21 samples of *Z. abyssinicus* (White-breasted white-eye) were collected from lowland scrub and riverine areas. These represented two (*Z. a. flavilateralis* and *Z. a. jubaensis*) of the four described mainland African *Z. abyssinicus* subspecies that are found throughout the lowlands of North East Africa.

Taxa from outside the focal region include represent an insular *Z. abyssinicus* race from the Island of Socotra, Gulf of Aden (*Z. a. socotranus*), three subspecies of *Z. pallidus* from South Africa (*Z. p. pallidus*, *Z. p. capensis*, *Z. p. virens*), *Z. senegalensis* from the Democratic Republic of Congo (not identified to the sub-specific level) and two *Z. senegalensis* subspecies from Ghana, Cameroon and Uganda (*Z. s. senegalensis*, *Z. s. stenocritus*). In addition to continental African taxa, representatives from Atlantic (Gulf of Guinea) and Indian Ocean islands systems are included based on the results of previous studies (Warren *et al.* 2006; Melo *et al.* 2011), as well as Asian (*Z. palpebrosus*) and Australian (*Z. lateralis*) species. The Chestnut-faced babbler, *Zosterornis whiteheadi* (Zosteropidae) (previously diagnosed as *Stachyris whiteheadi*) was selected as an outgroup based on previous studies (e.g. Warren *et al.* 2006; Melo *et al.* 2011).
