# Supplementary material for: Niche divergence promotes rapid diversification of East African sky island white-eyes (Aves: Zosteropidae)
Source: PubMed Central journal article supplement (PMC4255762; doi:10.1111/mec.12840), 2014-07-08
Supplement: mec0023-4103-SD4.pdf [file mec0023-4103-SD4.pdf]

**Table S2 Primers and thermal cycling conditions used in amplification and sequencing of genes.**

| Gene  | Primer name | Primer sequence                  | Reference                        | PCR conditions |           |           |        |
|-------|-------------|----------------------------------|----------------------------------|----------------|-----------|-----------|--------|
|       |             |                                  |                                  | Denature       | Annealing | Extension | Cycles |
| ND3   | L10755      | 5'-GACTTCCAATCTTTAAAATCTG-3'     | Chesser (1999)                   | 94°C           | 58°C      | 72°C      | 35     |
|       | H11151      | 5'-GATTTGTTGAGCCGAAATCAAC-3'     |                                  | 30s            | 40s       | 40s       |        |
| Cyt-b | CytbF25     | 5' GGCTCTCAATCTTCGTAAAAACC-3'    | This study                       | 94°C           | 60°C      | 72°C      | 35     |
|       | CytbR649    | 5'-GGGTGGAATGGGATTTTGTC-3'       | This study                       | 30s            | 60s       | 90s       |        |
|       | CytbF409    | 5'-GTAGGCTACGTCCTACCCTGAG-3'     | This study                       |                |           |           |        |
|       | CytbH16065  | 5'-GAGTCTTCAGTCTCTGGTTTACAAGAC-3 | Helm-Bychowski & Cracraft (1993) |                |           |           |        |
| TFGβ2 | TGF5        | 5'-GAAGCGTGCTCTAGATGCTG-3'       | Primmer <i>et al.</i> (2002)     | 94°C           | 56°C      | 72°C      | 35     |
|       | TGF6        | 5'-AGGCAGCAATTATCCTGCAC-3'       |                                  | 30s            | 30s       | 45s       |        |

PCR amplifications were performed in 15µl volumes with 2µl total genomic DNA, 9.7µl ddH<sub>2</sub>O, 1.5µl 10X PCR buffer, 0.75µl MgCl<sub>2</sub> (50mM), 0.15µl dNTP (2.5 mM of each), 0.45µl of each primer (10mM), and 0.15µl Taq DNA polymerase (5 units/µl).

### References

- Chesser RT (1999) Molecular systematics of the Rhinocryptid genus *Pteroptochos*. *The Condor*, **101**, 439-446.
- Helm-Bychowski K, Cracraft J (1993) Recovering phylogenetic signal from DNA sequences: relationships within the Corvine assemblage (Class Aves) as inferred from complete sequences of the mitochondrial DNA cytochrome-*b* gene. *Molecular Biology and Evolution*, **10**, 1196-1214.
- Primmer CR, Borge T, Lindell J, Setre GP (2002) Single-nucleotide polymorphism characterization in species with limited available sequence information: high nucleotide diversity revealed in the avian genome. *Molecular Ecology*, **11**, 603-612.
